# Supplementary material for: The Influence of Flame Retardants on Combustion of Glass Fiber-Reinforced Epoxy Resin
Source: MDPI journal article supplement (doi:10.3390/polym14163379), 2022-08-18
Supplement: s1 [file s1]

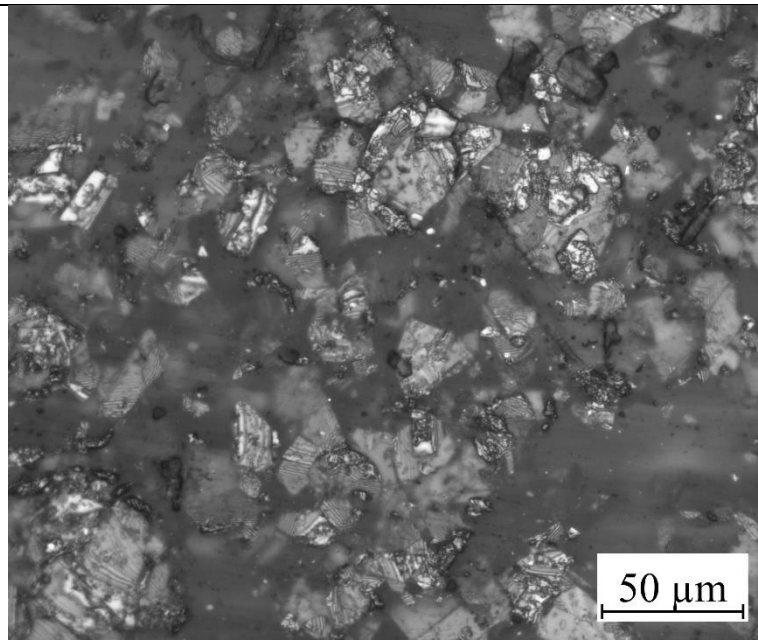

Optical microscopy

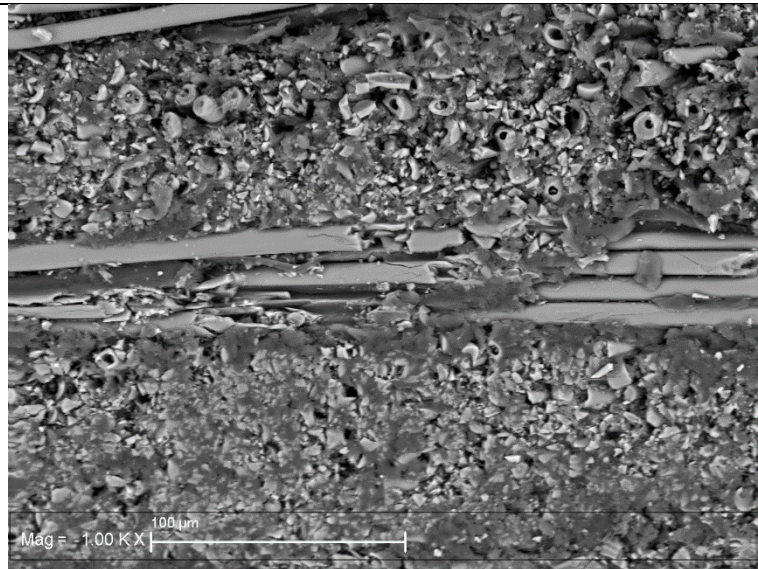

SEM microscopy

**Figure S1.** Micrographs of the GFRER+6% graphene surface.

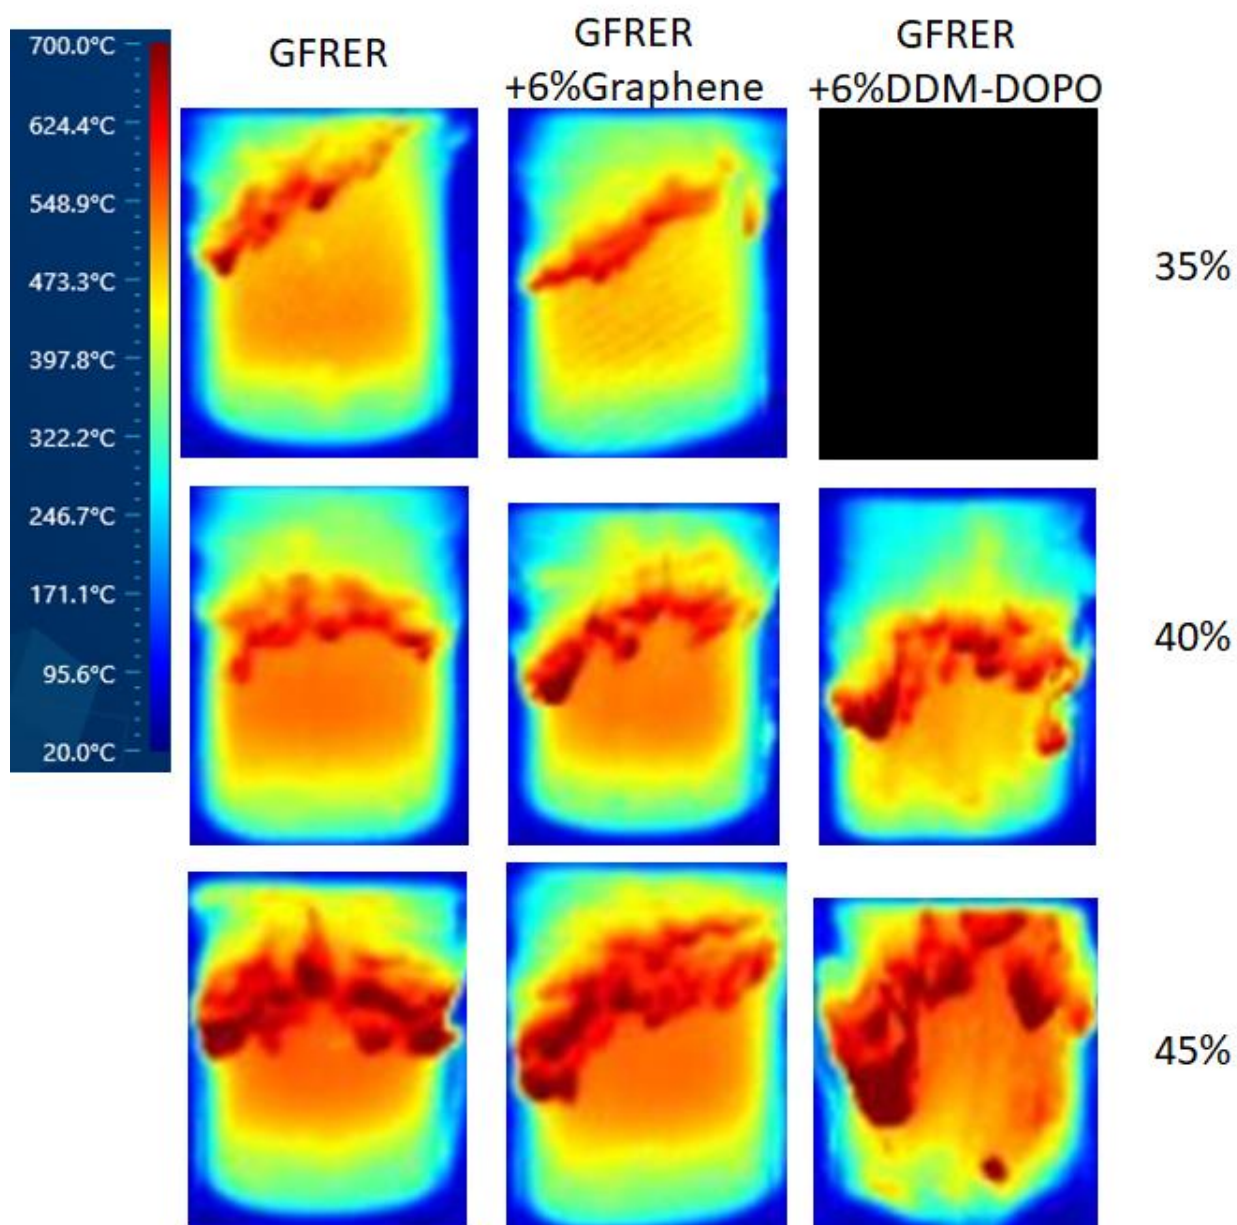

**Figure S2.** The surface temperature distributions during stationary combustion, obtained using an IR camera, for samples at 35%, 40% and 45% O<sub>2</sub> concentrations.

|                                                                                   |                                                                                     |                                                                                      |
|-----------------------------------------------------------------------------------|-------------------------------------------------------------------------------------|--------------------------------------------------------------------------------------|
|  |  |  |
| GFRRR                                                                             | GFRRR+6% graphene                                                                   | GFRRR+6% DDM-DOPO                                                                    |

**Figure S3.** Flame photos of GFRRR composites in the VBB test.
